# Supplementary material for: Design of a regulated lentiviral vector for hematopoietic stem cell gene therapy of globoid cell leukodystrophy
Source: PubMed Central journal article supplement — Mol Ther Methods Clin Dev. 2015 Oct 14;2:15038–. doi: 10.1038/mtm.2015.38 (PMC4605225; doi:10.1038/mtm.2015.38), 2015-10-14
Supplement: mtm201538-s1.pdf [file mtm201538-s1.pdf]

## Supplementary Figure S1, Ungari et al. 2015

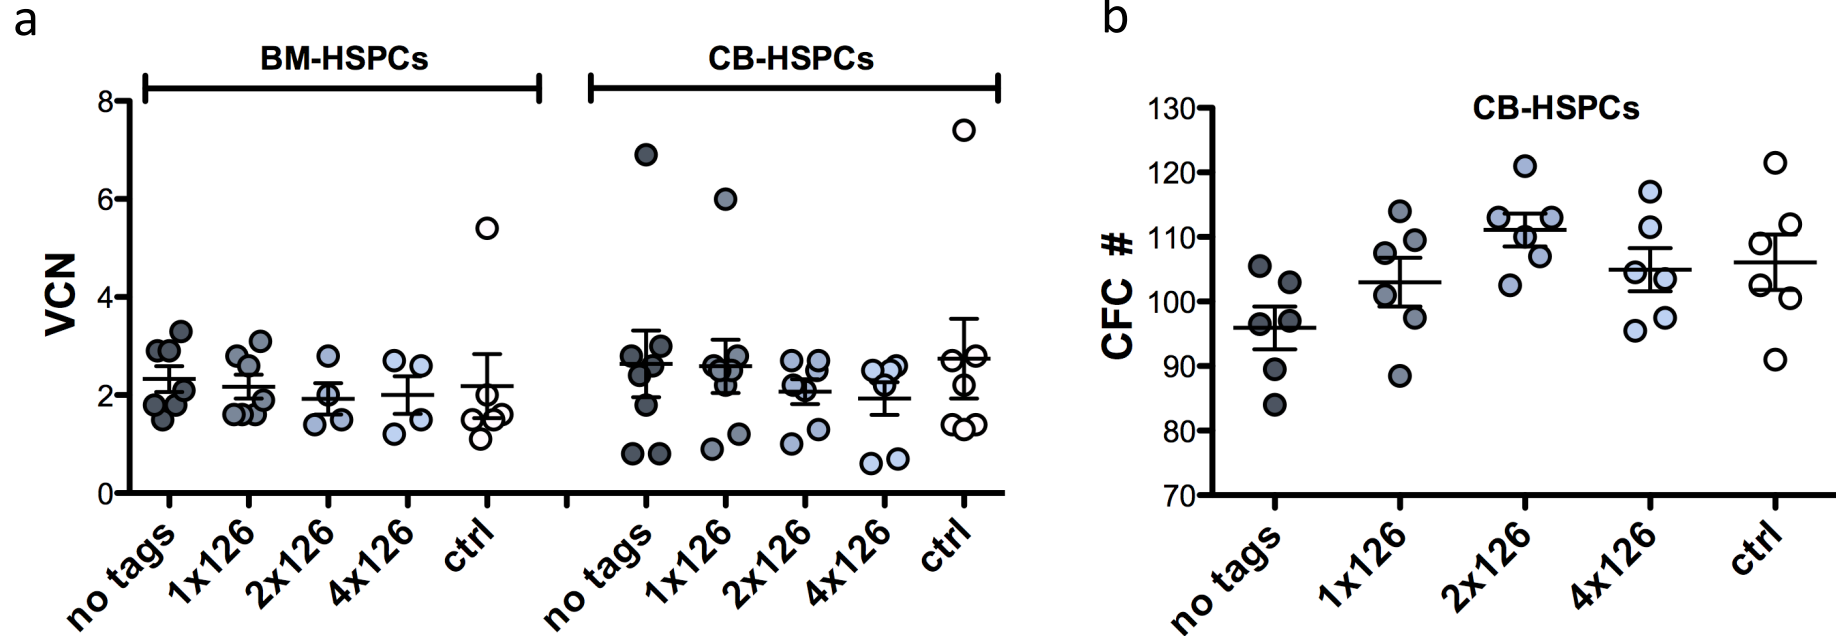

**Supplementary Figure S1. VCN evaluation in BM- and CB-derived hHSPCs and clonogenic potential of BM-derived HSPCs.** (a) VCN was measured on the *in vitro* culture progeny of BM-derived HSPCs (n≥4) and CB-derived HSPCs (n≥6) upon transduction with hGALC.LV (no tags), hGALC\_126T.LV (1x126T), hGALC\_2x126T.LV (2x126T), hGALC\_4x126T.LV (4x126T) or hIDUA.LV (ctrl). (b) The number (#) of colonies derived from transduced CB-derived HSPCs (n=6) is reported. Average values ± SEM are reported.

## Supplementary Figure S2, Ungari et al. 2015

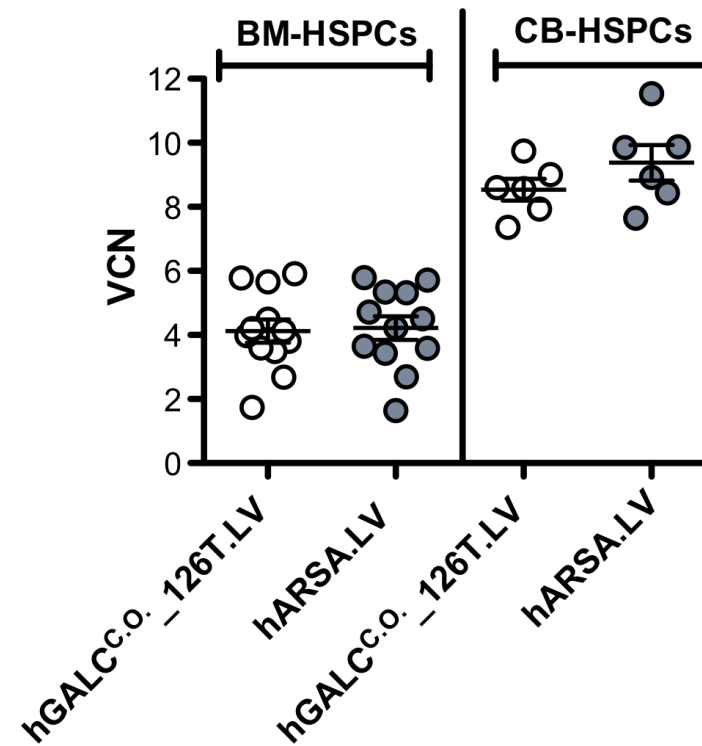

**Supplementary Figure S2. VCN evaluation in BM- and CB-derived hHSPCs.** VCN was measured on the *in vitro* culture progeny of BM-derived HSPCs (n=12 replicates coming from 6 donors) transduced either with hGALC<sup>c.o.</sup>-126T.LV or hARSA.LV and CB-derived HSPCs (n=6 donors) transduced with either hGALC<sup>c.o.</sup>-LV or hGALC<sup>c.o.</sup>-126T.LV or hARSA.LV. Average values ± SEM are reported.

Supplementary Figure S3, Ungari et al. 2015

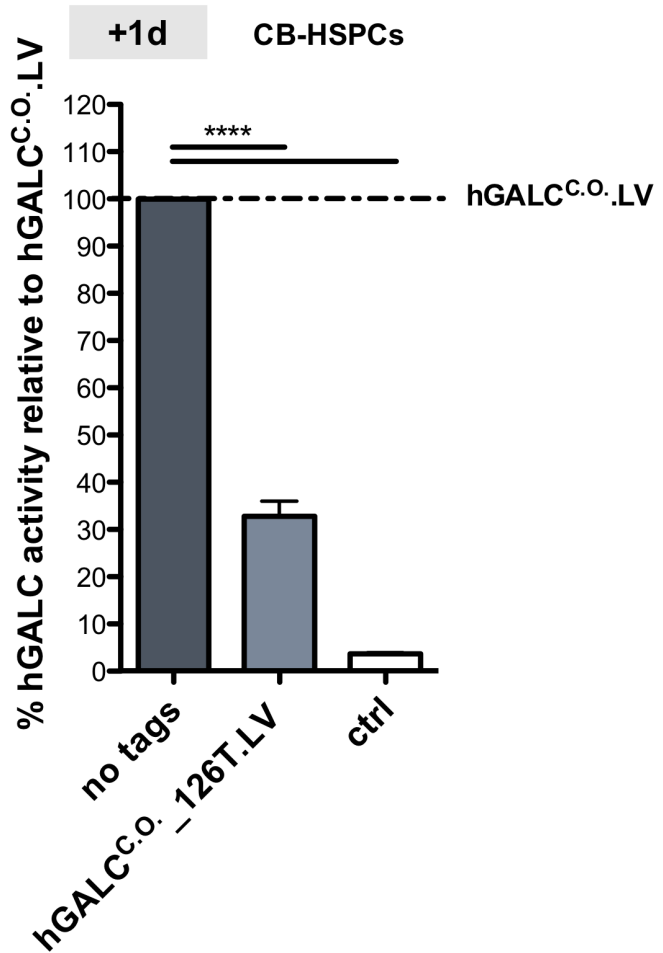

**Supplementary Figure S3. Short-term hGALC activity upon transgene codon optimization.** hGALC activity measured in CB-HSPCs (n=6 donors) upon transduction with hGALC<sup>C.O.</sup>.LV, hGALC<sup>C.O.</sup>\_126T.LV or hARSA.LV at +1d is reported. Values are expressed as percentage relative to the activity achieved upon hGALC<sup>C.O.</sup>.LV transduction (dotted line=100%) (mean ± SEM).

Supplementary Figure S4, Ungari et al. 2015

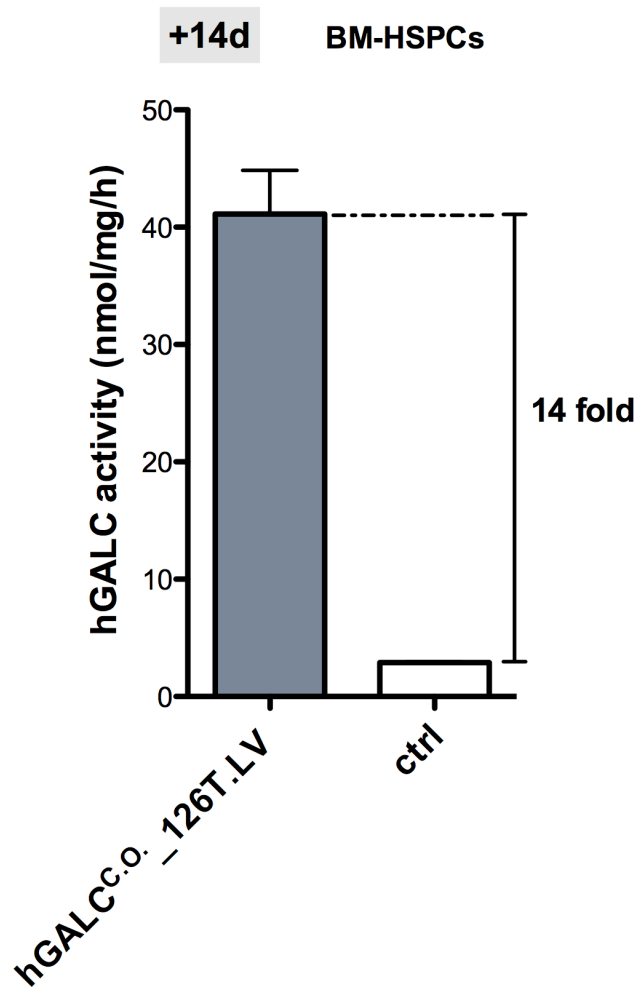

**Supplementary Figure S4. Long-term hGALC activity upon transgene codon optimization.** hGALC activity measured in BM-HSPCs (n=6 donors) upon transduction with hGALC<sup>c.o.</sup>\_126T.LV (1x126T) or hARSA.LV (ctrl) at +14 days is reported. Values are expressed as nmol/mg/h.

## Supplementary Figure S5, Ungari et al. 2015

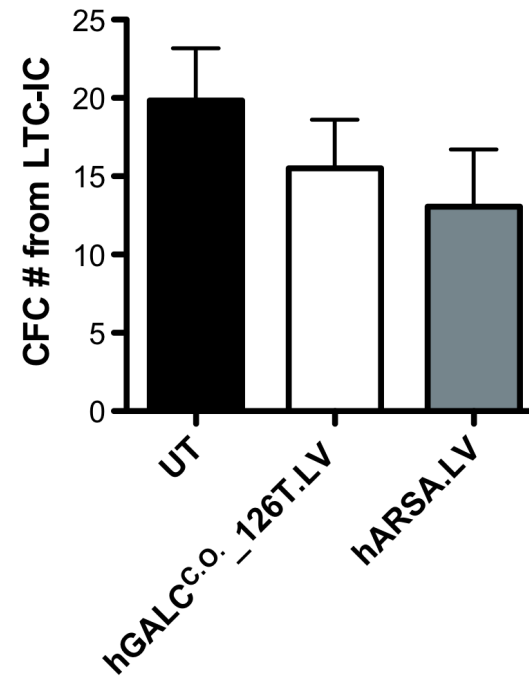

**Supplementary Figure S5. Clonogenic potential of long-term BM-derived HSPCs upon hGALC<sup>c.o.</sup>\_126T.LV transduction.** BM-derived HSPCs (n=9 replicates coming from 3 donors for transduced cells and n=3 replicates coming from 3 donors for UT cells) were transduced with hGALC<sup>c.o.</sup>\_1xmiR126T.LV or hARSA.LV and kept in culture on a feeder cell layer for 5 weeks and then were plated for the clonogenic assay. The number (#) of CFC are reported (mean±SEM).

## Supplementary Figure S6, Ungari et al. 2015

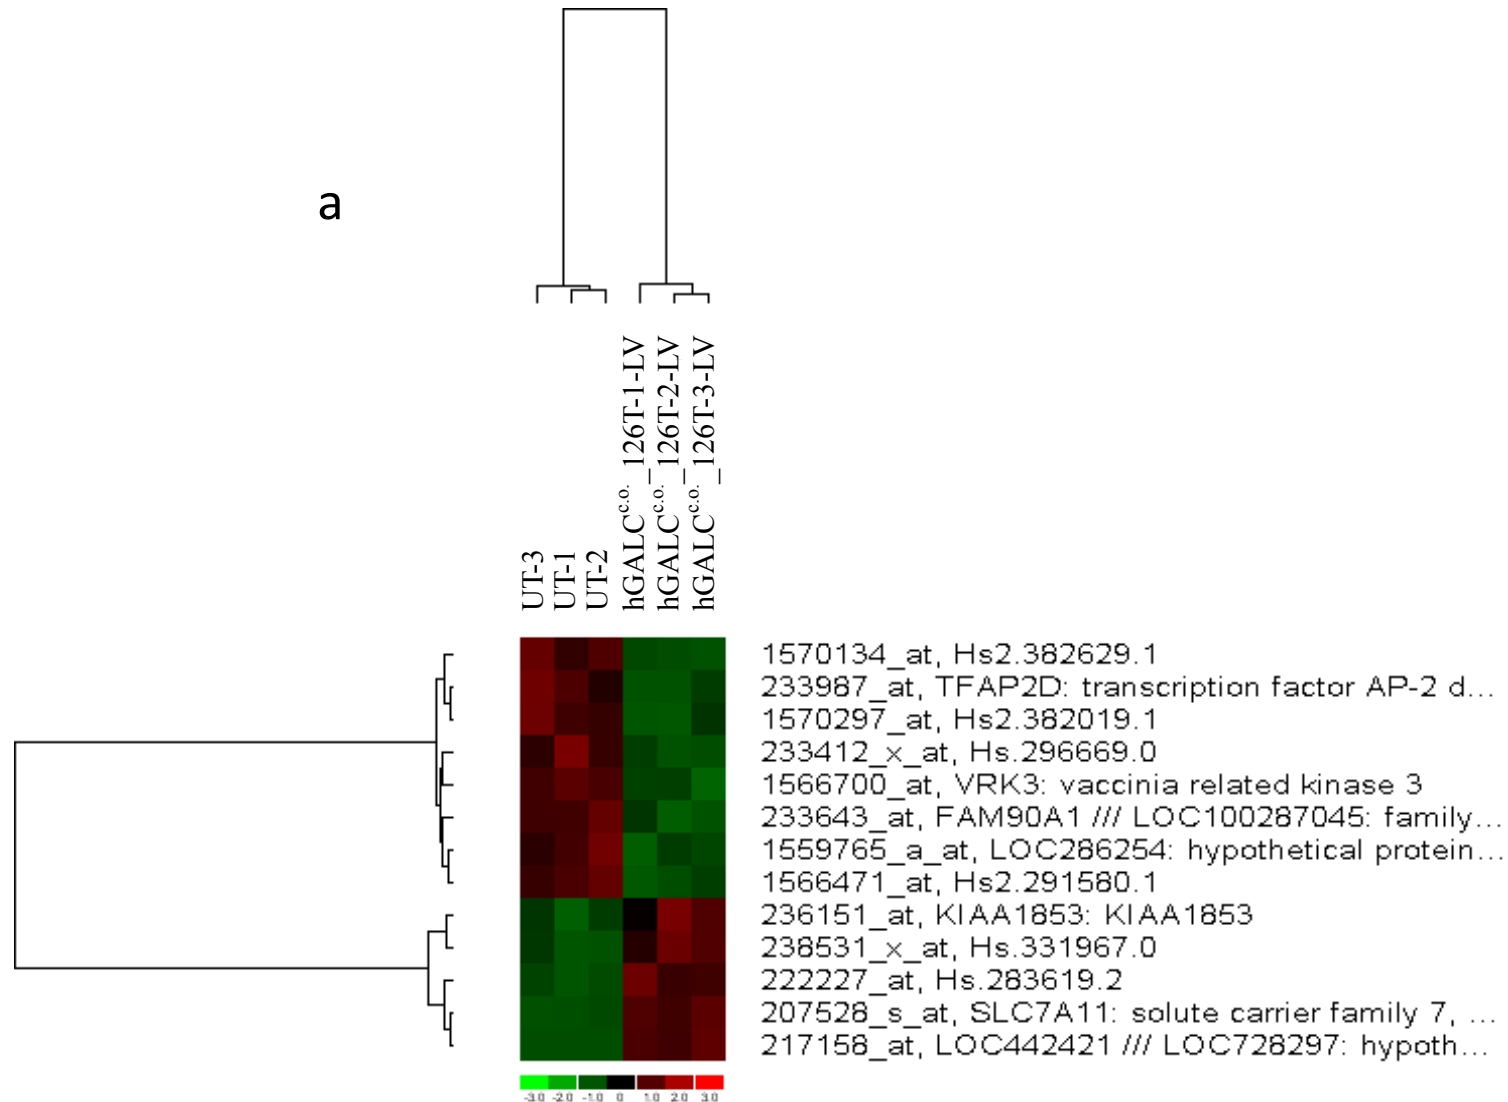

**Supplementary Figure S6. Gene expression analysis on BM-derived HSPCs upon hGALC<sup>c.o.</sup>\_126T.LV trasduction.** Supervised Affymetrix analysis of hGALC<sup>c.o.</sup>\_126T.LV (a), hARSA.LV (b), LV-transduced (c) and untransduced (UT) HSPCs. Comparison of the expression pattern identifies a set of deregulated genes according to fold change >2 and a p value of <0.05.

# Supplementary Figure S6, Ungari et al. 2015

b

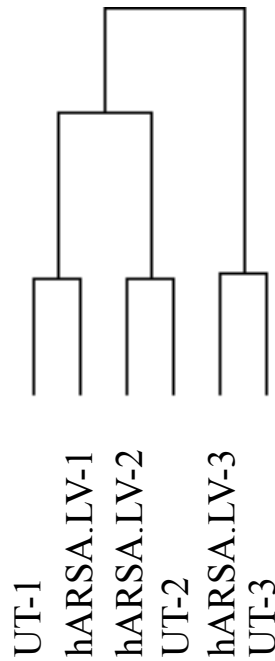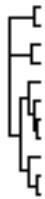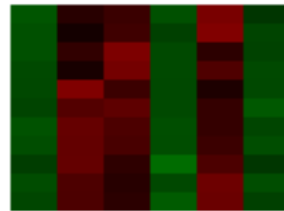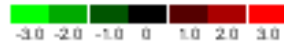

- 228394\_at, CO274: CO274 molecule
- 228315\_at, Hs.25144.1
- 222227\_at, Hs.283919.2
- 1554074\_s\_at, SLFNL1: schlafen-like 1
- 204443\_at, ARSA: arylsulfatase A
- 1922577\_at, Hs2.352623.1
- 234625\_at, LOC100503725: hypothetical protein LOC100503725
- 1553552\_at, TAAAR3: trace amino associated receptor 3
- 1558350\_at, CEP250: Centrosomal protein 250kDa
- 207523\_s\_at, SLC7A11: solute carrier family 7, (cationic amino acid transporter, y+ system) member 11
- 222188\_at, Clorf159: chromosome 9 open reading frame 159

# Supplementary Figure S6, Ungari et al 2015

C

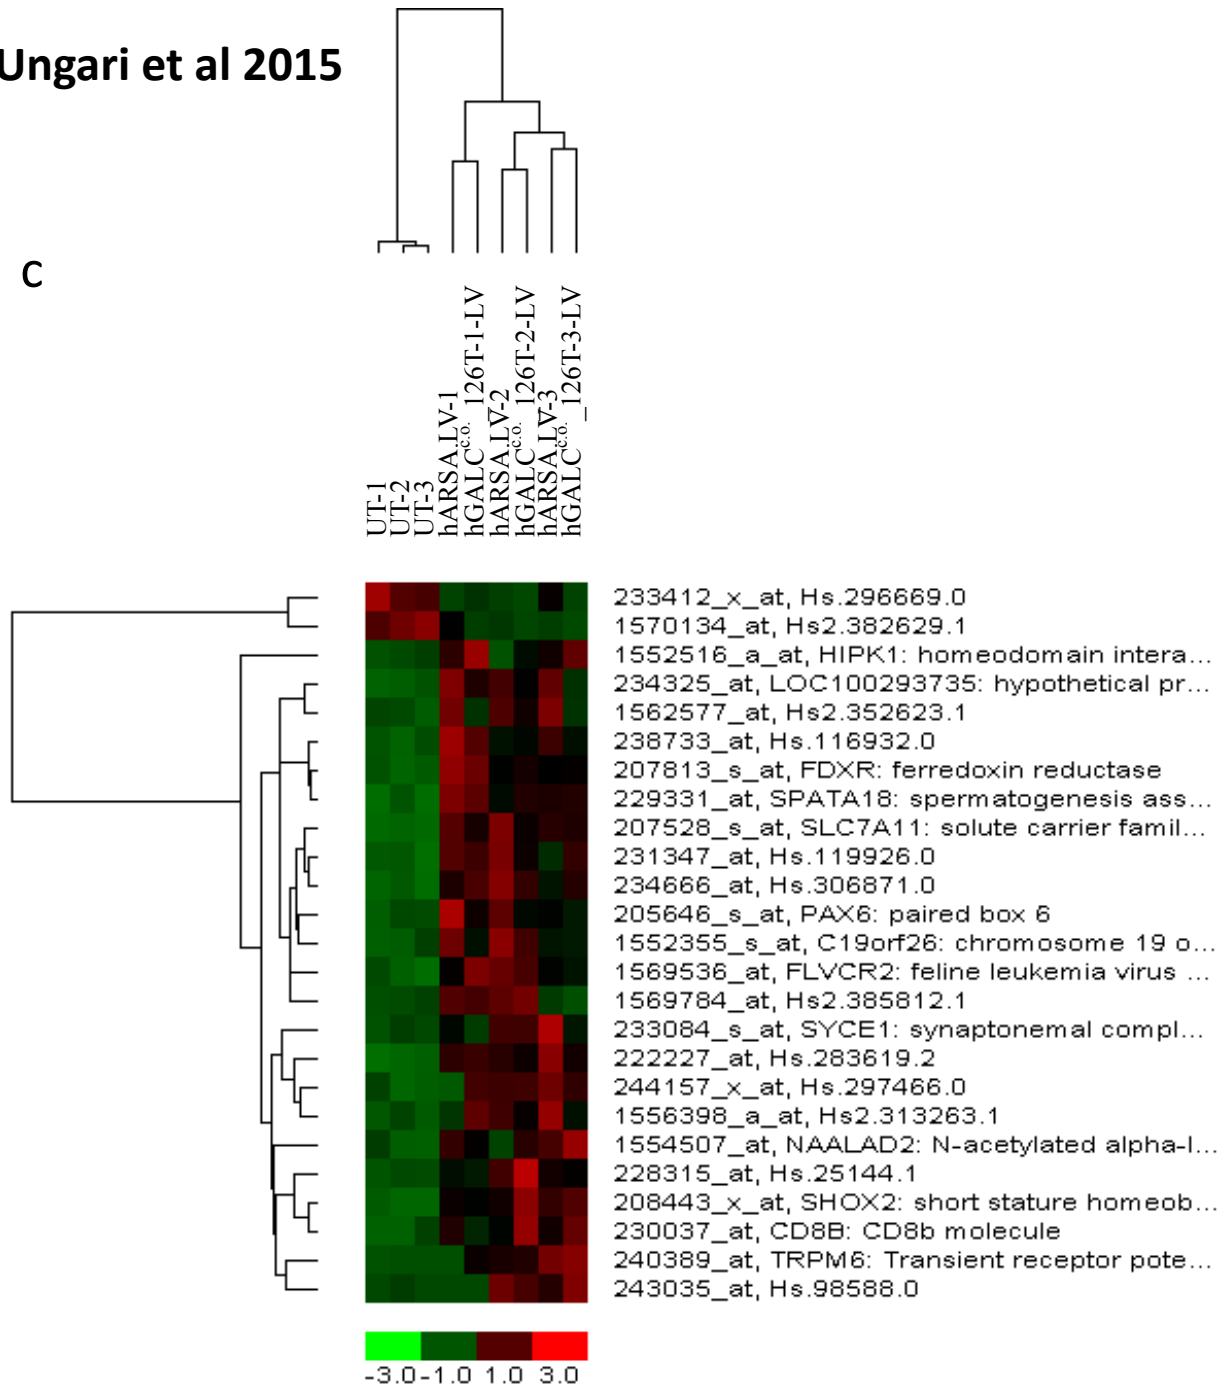



## Supplementary Figure S7, Ungari et al. 2015

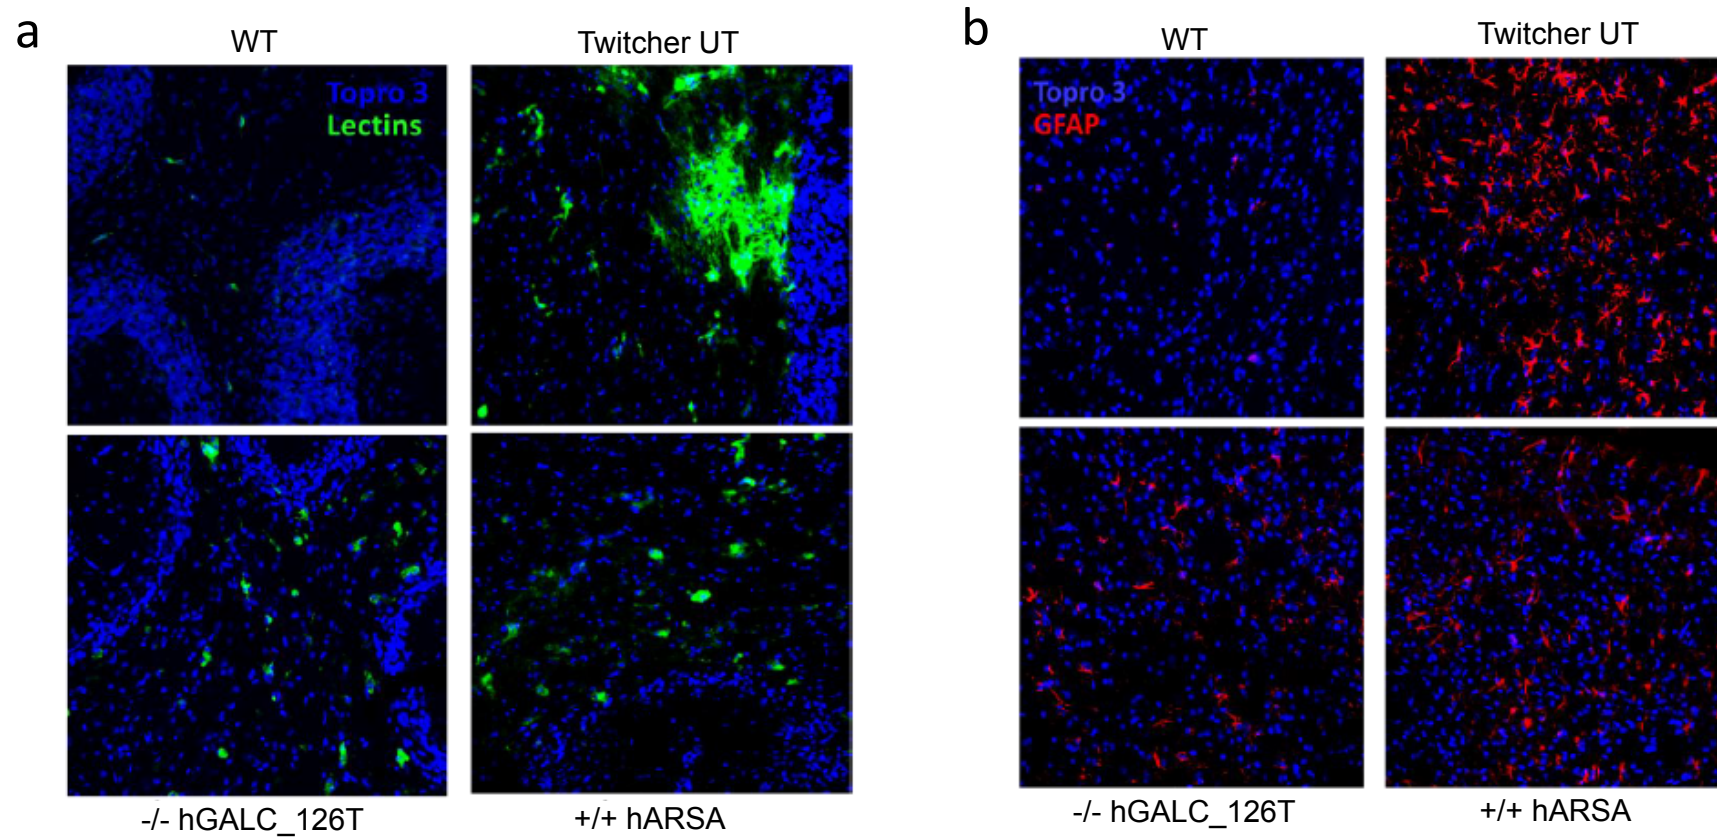

**Supplementary Figure S7. Evaluation of storages accumulation and astrogliosis.** Representative pictures of lectin staining in the cerebellum (a) and GFAP staining in the pons (b) of gene therapy treated mice and controls are reported.

## Supplementary Table S1, Ungari et al. 2015

|             | hGALC <sup>c.o.</sup> _126T.LV | hARSA.LV  |
|-------------|--------------------------------|-----------|
| Bone Marrow | 6.87±3.22                      | 4.66±2.61 |
| Brain       | 0.14±0.12                      | 0.02±0.01 |
| Spinal Cord | 0.79±0.62                      | 0.19±0.20 |
| Liver       | 0.05±0.02                      | 0.03±0.01 |

**Supplementary Table S1.** VCN measured in indicated tissues of -/- hGALC\_126T (n≥6) and +/+ hARSA (n≥3) mice are reported (mean±SD).
